# Supplementary material for: Predicting risk of late age-related macular degeneration using deep learning
Source: PubMed Central journal article supplement (PMC7453007; doi:10.1038/s41746-020-00317-z), 2020-08-27
Supplement: 41746_2020_317_MOESM1_ESM.pdf [file 41746_2020_317_MOESM1_ESM.pdf]

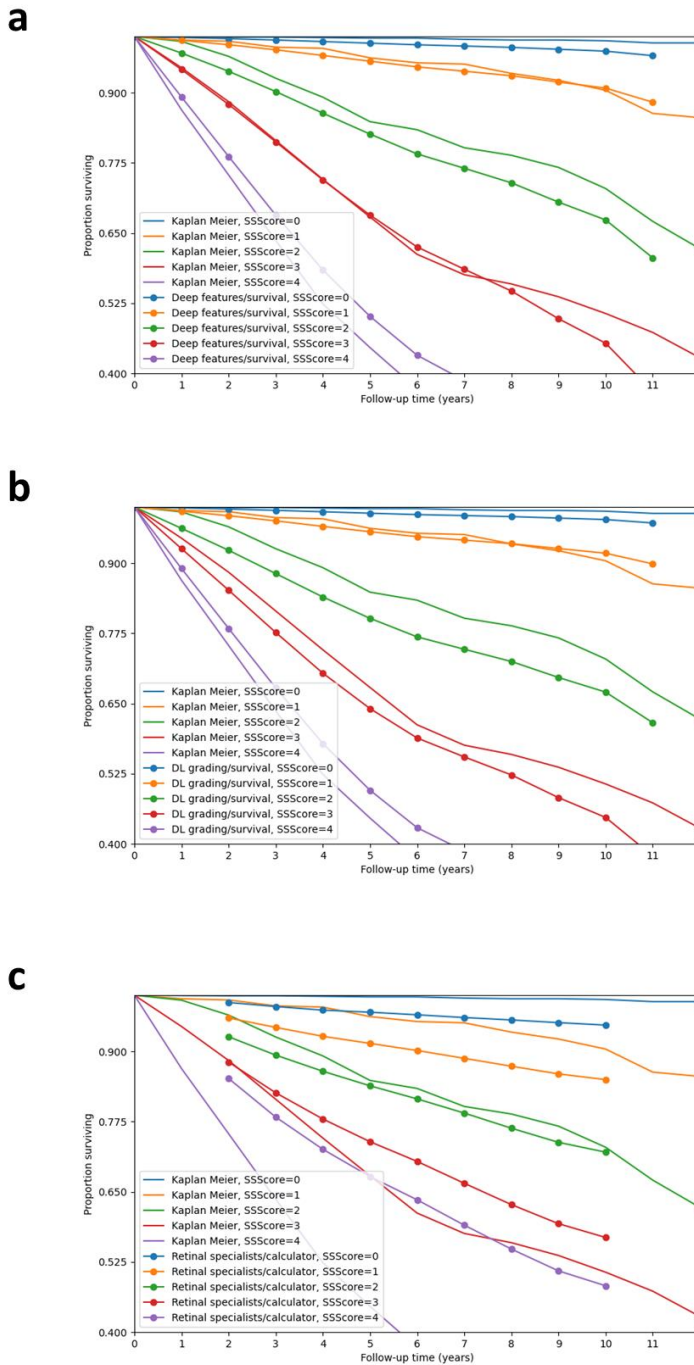

**Supplementary Figure 1. Survival model predictions for the 5 groups.** The participants were split into 5 groups based on the AREDS simplified severity scores at the baseline. Actual survival for the 5 groups is shown in lines (Kaplan-Meier curves). The deep features/survival, DL grading/survival, and retinal specialist/survival model predictions for the five groups are shown in lines with markers. The deep features/survival predictions corresponded better to actual progression data than those of the other two models.

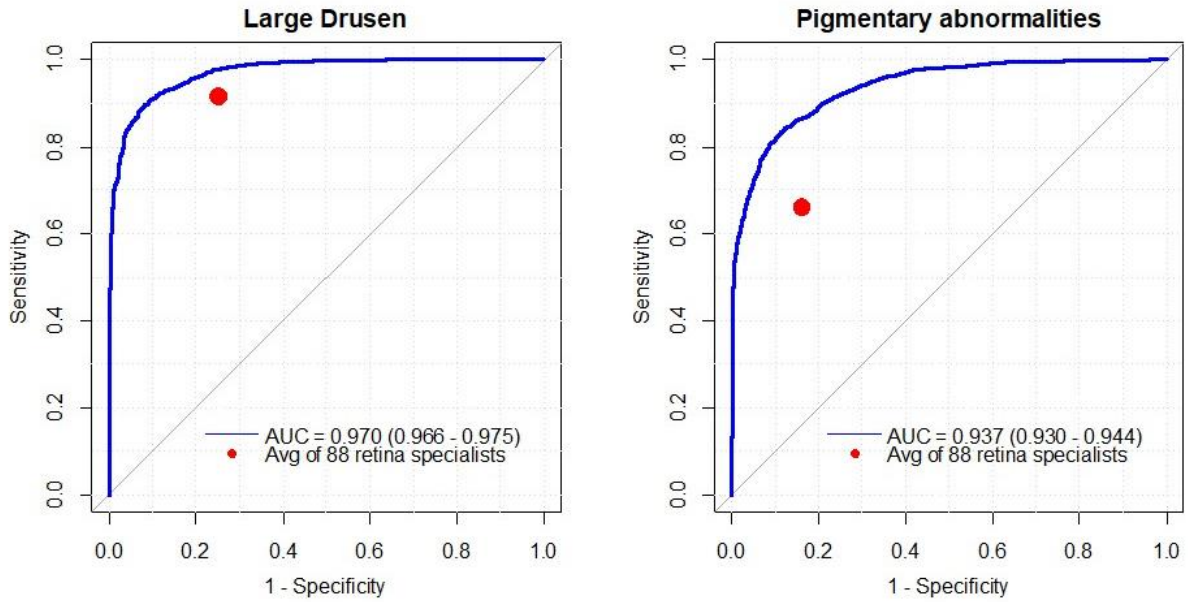

**Supplementary Figure 2. Receiver operating characteristic curves for the deep neural networks to grade drusen size and pigmentary abnormalities presence/absence on the combined AREDS/AREDS2 test sets (601 participants).** The AUC was used to evaluate the performance of deep neural networks in image classification (as opposed to predictions of progression), and for comparison with the retinal specialists (with reference to the Reading Center grades as the ground truth).

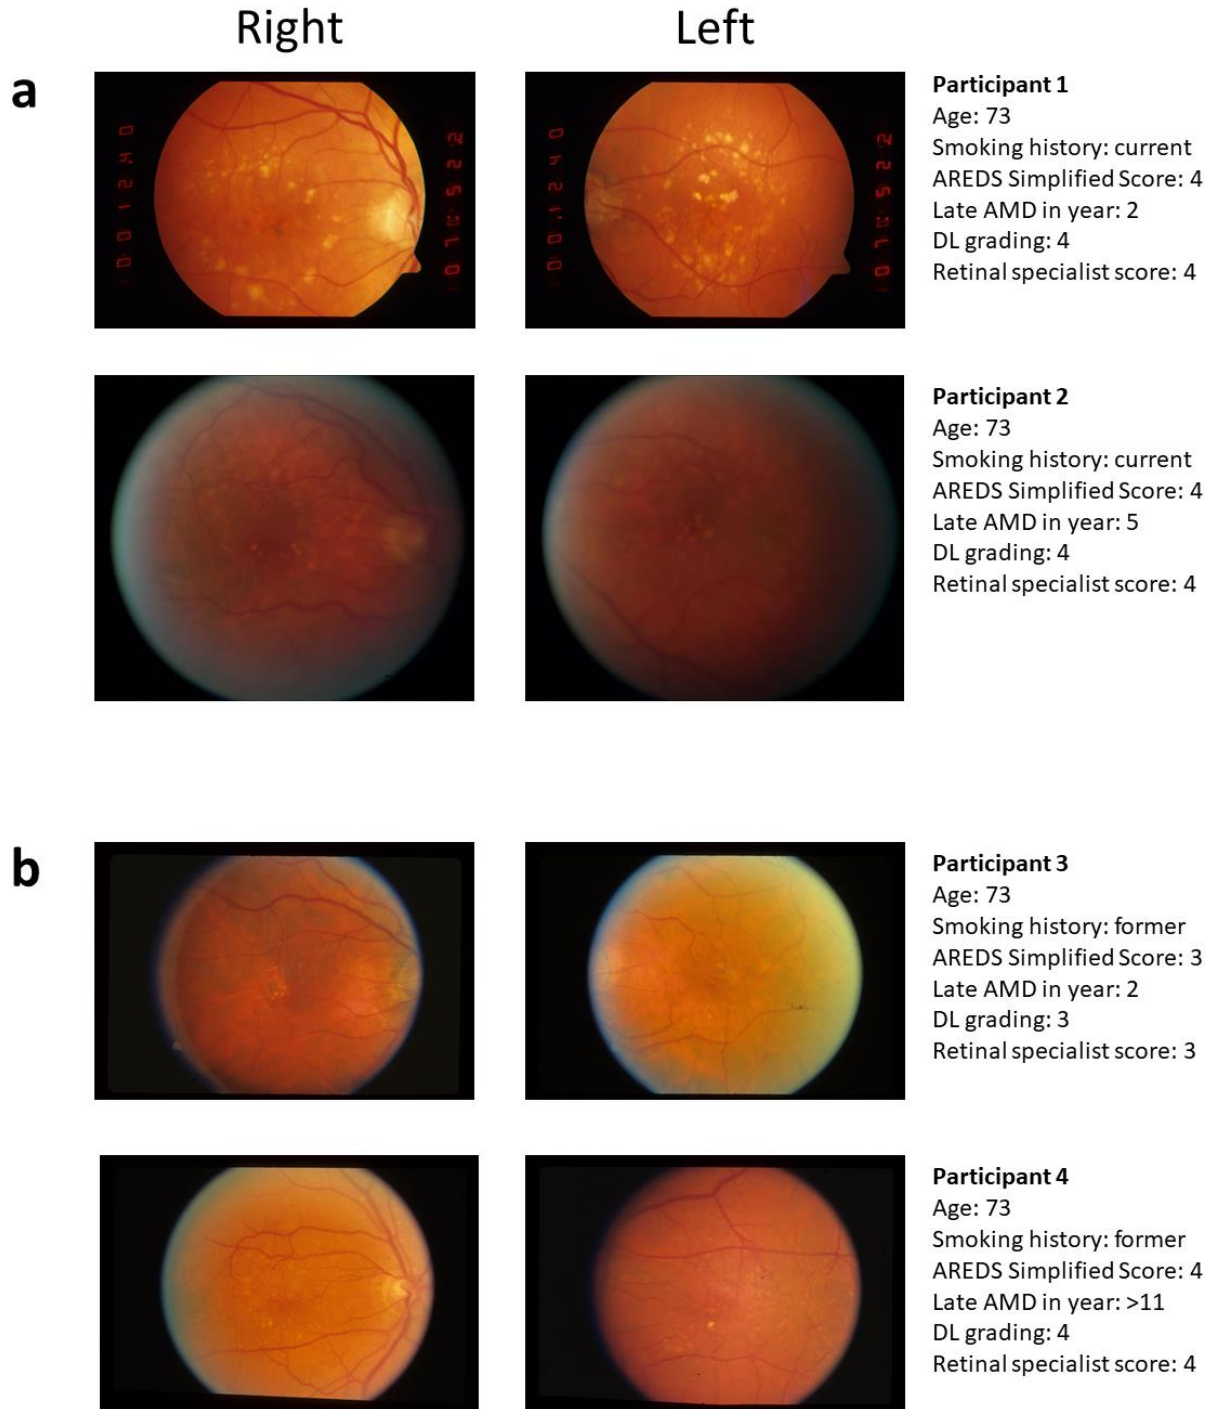

**Supplementary Figure 3. Example cases of progression to late age-related macular degeneration (AMD) where deep features/survival made more accurate predictions than retinal specialist/calculator or retinal specialist/Simplified Severity Scale (SSS).** a. Both participants were the same age (73 years) and had the same smoking history (current) and AREDS SSS scores (4) at baseline. The retinal specialist graded the SSS correctly. However, participant 1 progressed to late AMD at year 2 (GA in the right eye), but participant 2 progressed to late AMD at year 5 (GA in the left eye). Hence, both the retinal specialist/calculator and retinal specialist/SSS approaches *incorrectly* assigned the same risk

of progression to both participants (0.413). However, the deep feature/survival approach *correctly* assigned a higher risk of progression to participant 1 (0.751) and a lower risk to participant 2 (0.591). b. Both participants were the same age (73 years) and had the same smoking history (former). Their AREDS SSS scores at baseline were 3 and 4, respectively. The retinal specialist graded the SSS correctly. However, participant 3 progressed to late AMD at year 2 (neovascular AMD in the right eye), while participant 4 had still not progressed to late AMD by final follow-up at year 11. Hence, both the retinal specialist/calculator and retinal specialist/SSS approaches *incorrectly* assigned a lower risk of progression to participant 3 (0.259) and a higher risk to participant 4 (0.413). However, the deep feature/survival approach *correctly* assigned a higher risk of progression to participant 4 and a lower risk to participant 3 (0.569 vs 0.528).

**Supplementary Table 1. Number of images used to develop the classification network.**

| <b>Image characteristics</b>                                            | <b>AREDS</b> | <b>AREDS2</b> |
|-------------------------------------------------------------------------|--------------|---------------|
| Number of images                                                        | 57,375       | 17,658        |
| Training                                                                | 40,455       | 12,391        |
| Development                                                             | 5,535        | 1,738         |
| Test                                                                    | 11,385       | 3,529         |
| AMD drusen feature, by image, as classified by Reading Center           |              |               |
| No drusen or small drusen, No. (%)                                      | 24,290       | 191           |
| Medium drusen, No. (%)                                                  | 15,464       | 921           |
| Large drusen, No. (%)                                                   | 17,621       | 16,546        |
| AMD pigmentary abnormalities, by image, as classified by Reading Center |              |               |
| absent, No. (%)                                                         | 40,738       | 3,855         |
| present, No. (%)                                                        | 16,637       | 13,803        |

**Supplementary Table 2. Multivariate Association of Phenotypic, Demographic, and Genetic Variables and Progression to late AMD.** Deep features with p value<0.05 are shown.

| DL grading/survival     |              |           |         | Deep Feature/survival   |              |            |         |
|-------------------------|--------------|-----------|---------|-------------------------|--------------|------------|---------|
| Variable                | Hazard ratio | 95% CI    | p-value | Variable                | Hazard ratio | 95% CI     | p-value |
| Age                     | 1.05         | 1.04-1.07 | <.001   | Age                     | 1.05         | 1.04-1.06  | <.001   |
| Smoking status          | 1.17         | 1.03-1.32 | 0.017   | Smoking status          | 1.14         | 1.00-1.30  | 0.055   |
| <i>CFH</i> rs1061170    | 0.95         | 0.83-1.07 | 0.382   | <i>CFH</i> rs1061170    | 0.89         | 0.77-1.04  | 0.085   |
| <i>ARMS2</i> rs10490924 | 0.95         | 0.83-1.09 | 0.490   | <i>ARMS2</i> rs10490924 | 0.90         | 0.77-1.04  | 0.161   |
| AMD GRS                 | 1.35         | 1.24-1.47 | <.001   | AMD GRS                 | 1.38         | 1.25-1.52  | <.001   |
| drusen score (LE)       | 2.26         | 1.84-2.78 | <.001   | feature335              | 0.14         | 0.05-0.37  | <.001   |
| drusen score (RE)       | 1.89         | 1.56-2.28 | <.001   | feature79               | 0.24         | 0.09-0.66  | 0.005   |
| pig abn (LE)            | 2.28         | 1.88-2.76 | <.001   | feature449              | 0.56         | 0.35-0.91  | 0.020   |
| pig abn (RE)            | 1.72         | 1.42-2.08 | <.001   | feature234              | 9.41         | 1.04-85.11 | 0.046   |

LE-left eye, RE-right eye, pig abn-pigmentary abnormality, GRS-Genetic Risk Score.

**Supplementary Table 3. The C-statistic (95% confidence interval) of the survival models in predicting risk of progression to late age-related macular degeneration on the combined AREDS/AREDS2 test sets (601 participants).**

| <b>Models</b>          | <b>1</b> | <b>2</b>        | <b>3</b>        | <b>4</b>        | <b>5</b>        |
|------------------------|----------|-----------------|-----------------|-----------------|-----------------|
| Late AMD               |          |                 |                 |                 |                 |
| DL grading /calculator | -        | 82.2(81.8,82.6) | 82.6(82.3,83.0) | 83.4(83.1,83.6) | 83.5(83.3,83.7) |
| DL grading /SSS*       | -        | -               | -               | -               | 82.3(82.1,82.5) |
| Geographic atrophy     |          |                 |                 |                 |                 |
| DL grading /calculator | -        | 84.7(84.4,85.1) | 83.4(83.1,83.7) | 84.2(83.9,84.4) | 83.7(83.4,83.9) |
| DL grading /SSS*       | -        | -               | -               | -               | -               |
| Neovascular AMD        |          |                 |                 |                 |                 |
| DL grading /calculator | -        | 78.2(77.4,79.0) | 80.1(79.5,80.6) | 78.7(78.3,79.1) | 79.4(79.1,79.7) |
| DL grading /SSS*       | -        | -               | -               | -               | -               |

**Supplementary Table 4. The C-statistic (95% confidence interval) of three models in predicting risk of progression to late age-related macular degeneration on the combined AREDS/AREDS2 test sets (601 participants).**

|               | <b>DL grading</b>    | <b>DL features</b>   |
|---------------|----------------------|----------------------|
| Nnet-survival | 0.803 (0.799, 0.808) | 0.851 (0.846, 0.856) |
| DeepSurv      | 0.842 (0.837, 0.847) | 0.859 (0.854, 0.865) |
| COX PH        | 0.849 (0.846, 0.853) | 0.867 (0.865, 0.868) |
